# Supplementary material for: GAD Treatment and Insulin Secretion in Recent-Onset Type 1 Diabetes
Source: Atypon-hosted journal article supplement (doi:10.1056/nejmoa0804328), 2008-10-08
Supplement: nejm_ludvigsson_1909sa1.pdf [file nejm_ludvigsson_1909sa1.pdf]

## Supplementary Appendix

This appendix has been provided by the authors to give readers additional information about their work.

Supplement to: Ludvigsson J, Faresjö M, Hjorth M, et al. GAD treatment and insulin secretion in recent-onset type 1 diabetes. *N Engl J Med* 2008;359:1909-20. DOI: 10.1056/NEJMoa0804328.

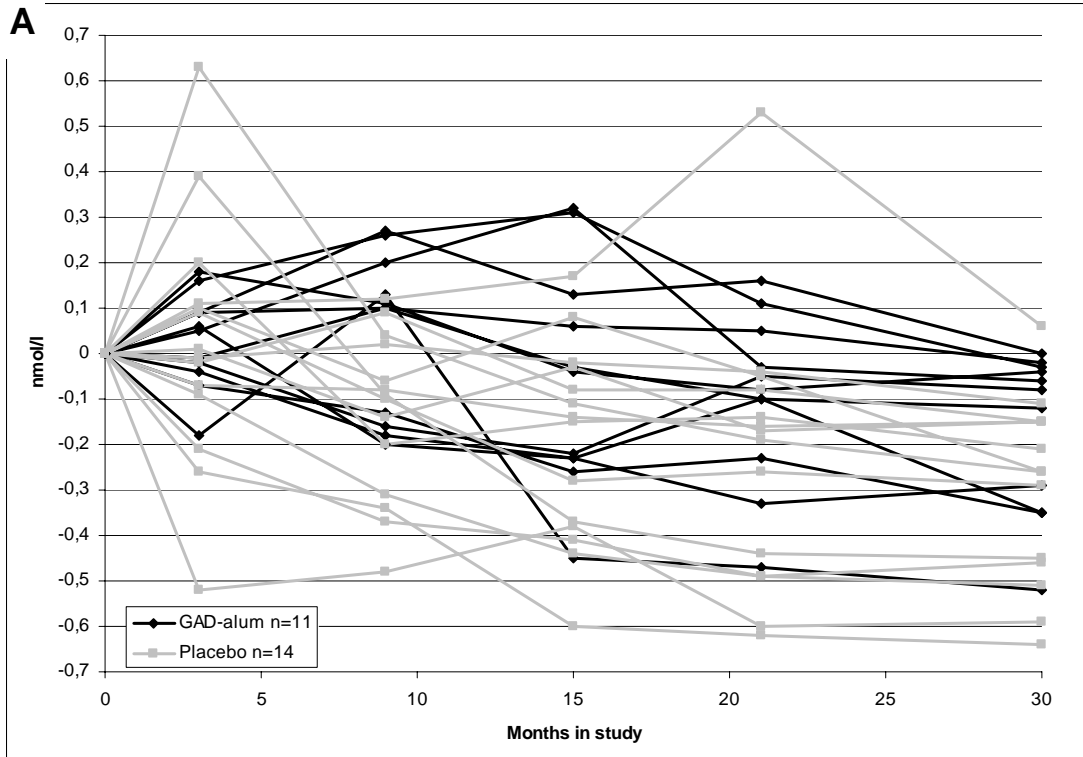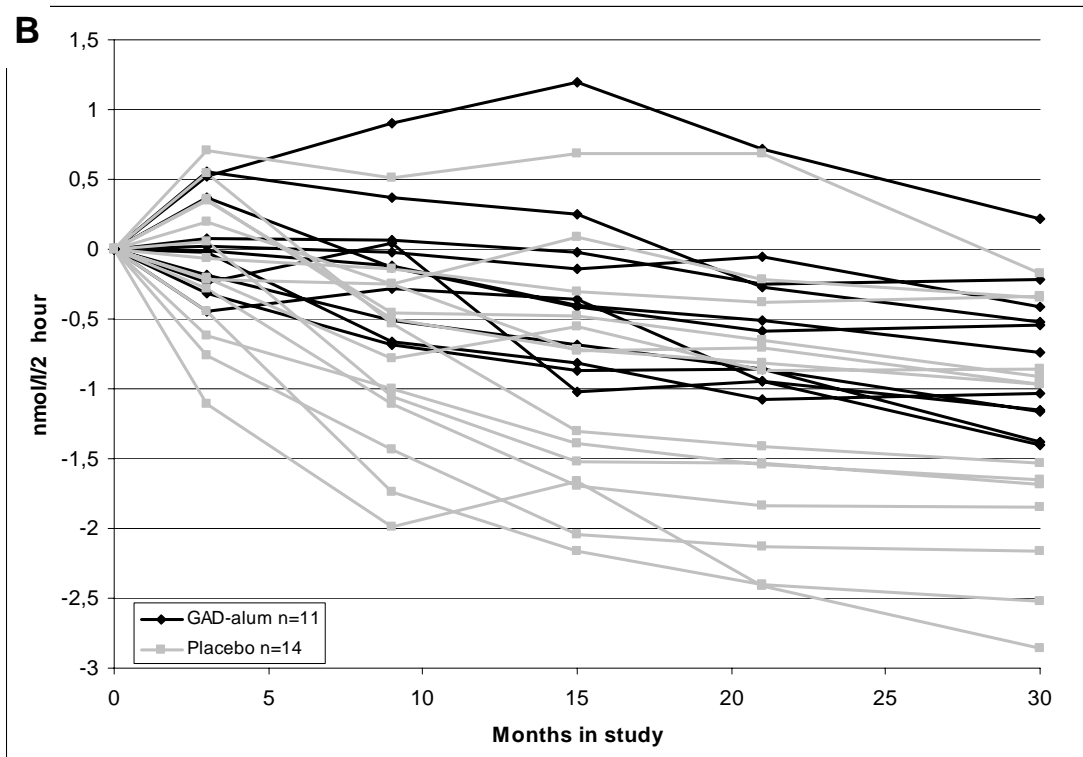

**Supplemental figure. Change in C-peptide for individual patients with <6 month duration**

A – Fasting, B – Stimulated (AUC, MMTT)
